1 **TITLE PAGE**

2 A Phased *Canis lupus familiaris* Labrador Retriever Reference Genome Utilizing High Molecular Weight  
3 DNA Extraction Methods and High Resolution Sequencing Technologies

4

5 Robert A. Player<sup>1</sup>, Ellen R. Forsyth<sup>1</sup>, Kathleen J. Verratti<sup>1</sup>, David W. Mohr<sup>2</sup>, Alan F. Scott<sup>2</sup>, Christopher  
6 E. Bradburne\*<sup>1,2</sup>

7 1. Asymmetric Operations Sector, The Johns Hopkins University Applied Physics Laboratory,  
8 11100 Johns Hopkins Road, Laurel, MD 20723

9 2. McKusick-Nathans Department of Genetic Medicine, Johns Hopkins School of Medicine, 600 N.  
10 Wolfe St., Baltimore MD 21287

11

12 \*Corresponding author:

13 Christopher Bradburne, PhD

14 The Johns Hopkins University Applied Physics Laboratory

15 11100 Johns Hopkins Road

16 Laurel, Maryland 20723

17 Office: 443-778-0561

18 Email: [christopher.bradburne@jhuapl.edu](mailto:christopher.bradburne@jhuapl.edu)

19

20 Running Title: Phased Genome Assembly for Labrador Retriever

21 Keywords: de novo assembly, phased genome assembly, *Canis lupus familiaris*, Labrador Retriever

## 22 **ABSTRACT**

23           Reference genome fidelity is critically important for genome wide association studies (GWAS),  
24 yet many are incomplete or too dissimilar from the study population. A typical whole genome sequencing  
25 approach implies short-read technologies resulting in fragmented assemblies with regions of ambiguity  
26 low complexity. Further information is lost by economic necessity when genotyping populations, as lower  
27 resolution technologies such as genotyping arrays are commonly utilized. Here we present a phased  
28 reference genome for *Canis lupus familiaris* utilizing high molecular weight sequencing technologies. We  
29 tested wet lab and bioinformatic approaches to demonstrate a minimum workflow to generate the 2.4  
30 gigabase genome for a Labrador Retriever. The resulting *de novo* assembly required eight Oxford  
31 Nanopore R9.4 flowcells (~23X depth) and running a 10X Genomics library on the equivalent of one lane  
32 of an Illumina NovaSeq S1 flowcell (~88X depth), bringing the cost of generating a nearly complete  
33 reference genome to less than \$10K. Mapping of publicly available short-read data from ten Labrador  
34 Retrievers against this breed-specific reference resulted in an average of approximately 1% more aligned  
35 reads compared to mapping against the current gold standard reference (CanFam3.1,  $p < 0.001$ ), indicating  
36 a more complete breed-specific reference. An average 15% reduction of variant calls was observed from  
37 the same mapped data, which increases the chance of identifying low effect size variants in a GWAS. We  
38 believe that by incorporating the cost to produce a full genome assembly into any large-scale canine  
39 genotyping study, an investigator can make an informed cost/benefit analysis regarding genotyping  
40 technology.

41

## 42 **INTRODUCTION**

43           The revolution in genomic sequencing technologies is creating a wealth of information about  
44 diverse taxa. Typically, an organism is sequenced as a high quality reference, and then the variability in  
45 genomic content within individuals is surveyed using cheaper, more economically viable technologies  
46 (Green and Guyer 2011). Over time, the costs of genomic characterization are reduced as technological

47 performance increases. This means that periodically, new references need to be established that can be  
48 used for read mapping and scaled genotyping approaches, such as the design of new Single Nucleotide  
49 Polymorphism (SNP) arrays used to genotype large numbers of individuals. An example is the human  
50 genome, which was established in draft form in 2001 at a cost of \$3.2B US (Venter et al. 2001).  
51 Following completion, haplotyping of populations continued at a large scale using high-throughput SNP  
52 chips, which initially started with a few hundred thousand SNPs but within 10 years contained millions.  
53 Likewise the human reference has been continually updated, starting in 2001, with a draft sequence  
54 covering more than 90% of the genome, had a 1:1000 base pair (bp) error rate, and contained 150,000  
55 gaps. Within two years the same genome had reached 99% coverage, 1:10,000 bp error rate, and only 400  
56 gaps (“Human Genome Project FAQ” n.d.). According to the National Human Genome Research Institute  
57 (NHGRI) tracking site, the cost has stabilized at around \$1K per full human genome since 2015.  
58 However, the human genomes considered for this estimation do not come close to full completion, having  
59 a 1:100 bp error rate along with widely varying percent coverage (“DNA Sequencing Costs: Data” n.d.).  
60 The \$1K estimate also assumes the utilization of whole genome sequencing (WGS) short read  
61 technologies. For Genome-Wide Association Studies (GWAS), lack of genetic information due to  
62 incomplete genomes can lead to false negatives from an inability to see real variants, or false positives  
63 from false variant calls against a reference. In fact, the early reliance on SNPs to type the variation in  
64 humans has likely contributed to the ‘missing heritability’ problem of human genomic medicine (Manolio  
65 et al. 2009; Young 2019).

66 Canids share a similar story. The current reference sequence for canids is a boxer: CanFam3.1,  
67 submitted to NCBI in November of 2011 (Kim et al. 1998; Lindblad-Toh et al. 2005). It was sequenced  
68 with Illumina short read technologies and has been continuously updated ever since (the latest update as  
69 of this article was in June of 2019) (“Canis Lupus Familiaris - Ensembl Genome Browser 100” n.d.).  
70 Various SNP genotyping chips, whose costs are dependent on scale but average \$100-\$500 per animal,

71 have been developed, but much of the detectable genetic variation depends on an incomplete and  
72 constantly changing reference. Long read technologies have the potential to change this paradigm and  
73 lead the community to generate single reference genomes for individual projects. The longer read lengths  
74 of approximately 2 to 30 kb (kilobase) remove many of the bioinformatic challenges inherent in short  
75 read sequencing and allow previously unheard of resolution to observe structural variants and the  
76 organization of long stretches of low-complexity DNA. A genome assayed with this ‘high-resolution  
77 genomic’ approach using longer reads could provide structural variants together with SNPs. Further,  
78 application of high-resolution genomics across a population for a GWAS could illuminate any ‘missing  
79 heritability’ for a population, such as structural variants that are unresolvable with SNP or WGS short  
80 read platforms. Canids provide an excellent test case for this approach.

81 *Canis lupus familiaris* has been under selection by human breeding for thousands of years, which  
82 has created extremely variable morphologies within a single species (Plassais et al. 2019). Therefore,  
83 unlike human genomes that have many common variants of low effect size, dogs have many common  
84 variants of large effect size. Any study that lacks genomic context of a breed by not having a high-quality  
85 reference genome specific to that breed runs the risk of missing important SNPs and structural variants  
86 that may be associated with interesting phenotypes. We set out to establish the best workflows to provide  
87 the highest quality genome at the lowest cost, taking advantage of Oxford Nanopore Technologies (ONT),  
88 10X Genomics, and Illumina sequencing technologies. The resulting genome is of a yellow Labrador  
89 Retriever, named ‘Yella’, and we estimate that similar workflows could be used to easily generate high-  
90 quality reference genomes for researchers or breeders establishing studies requiring high-resolution  
91 variation. Further, we assert that any large-scale study on genetic variation for a population should begin  
92 with the establishment of a local high-quality reference genome for that population.

93

94 **RESULTS**

95 When setting out to produce a high-quality, phased reference genome, careful consideration  
96 should be given to wet lab processes that do the following: 1) provide optimal preservation for  
97 downstream extraction, 2) generate high quantity and quality of high molecular weight (HMW) DNA, and  
98 3) are robust and reproducible (i.e., they provide the least amount of variability between different  
99 individual blood samples). Figure 1 shows the wet lab process flow and components that were evaluated  
100 in this study, and used to generate HMW canine DNA for sequencing and *de novo* genome assembly.

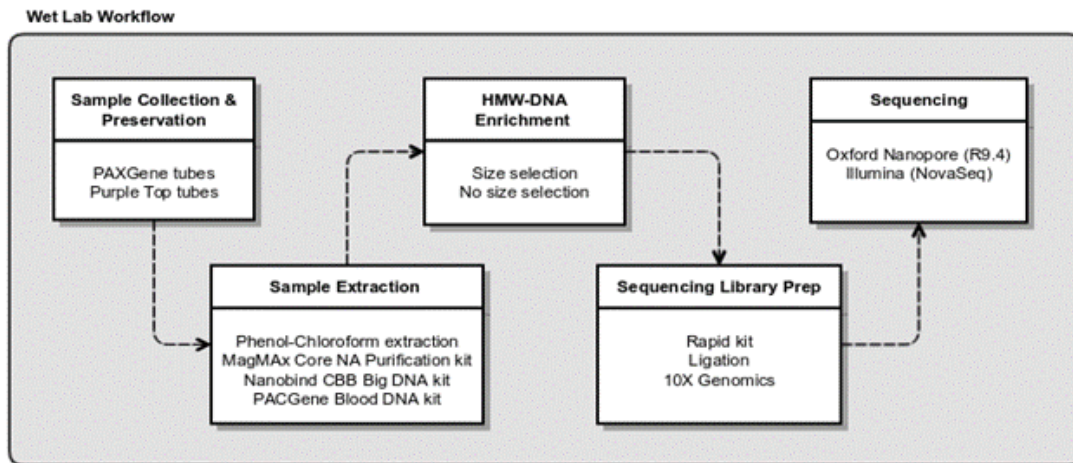

101  
102 Figure 1. Diagram of wet lab workflow for testing sample collection, extraction, and sequencing library  
103 preparation methods used in this study.

104

#### 105 *Preservation, extraction, and acquisition of HMW-DNA*

106 Canine blood samples were collected and delivered in either the PAXgene DNA proprietary  
107 storage media or a purple top Vacutainer tube with EDTA (ethylenediaminetetraacetic acid). These two  
108 preservative types were evaluated in conjunction with four DNA extraction and isolation methods: 1) a  
109 standard phenol chloroform extraction (PCE) method, 2) the Magmax Core NA Purification, 3) the  
110 Nanobind CBB Big DNA kit, and 4) the PAXgene Blood DNA kit. Blood samples from Yella stored in  
111 the purple top tubes and extracted with the Nanobind kit yielded the best purity (highest 260/280 ratio)

112 and highest concentrations (Table 1, additional information in Table S1). Compared to PCE from the  
 113 same storage method, this is equivalent to a 92-fold increase in extraction efficiency. In terms of total  
 114 recovered NA, the PAXgene extraction from the purple top tube performed best, yielding over 10 ug  
 115 DNA. Most importantly, significant fractions of HMW-DNA using the PAXgene extraction kit were not  
 116 detected (Figure S1). Direct comparison of extraction kits showed that the Nanobind kit provided the  
 117 most consistent DNA yield and quality among the four kits tested using blood stored in EDTA from four  
 118 different canines (Table 2 and Figure 2).

| Storage Agent         | NA Isolation Method         | Input Volume (uL) | Output Volume (uL) | NA Conc (ng/uL) | Recovered NA Total (ng) | NA Quality (260/280) | HMW DNA Yielded? |
|-----------------------|-----------------------------|-------------------|--------------------|-----------------|-------------------------|----------------------|------------------|
| proprietary (PAXgene) | PCE                         | 1700              | 1000               | 6.37            | 6370                    | 2.20                 | yes              |
| proprietary (PAXgene) | Magmax Core NA Purification | 200               | 90                 | 2.03            | 183                     | 1.66                 | yes              |
| proprietary (PAXgene) | Nanobind CBB Big DNA kit    | 200               | 100                | 11.10           | 1110                    | 1.87                 | yes              |
| proprietary (PAXgene) | PAXgene Blood DNA kit       | 1700              | 1000               | 6.40            | 6400                    | 2.38                 | no               |
| EDTA (purple top)     | PCE                         | 1700              | 1000               | 0.38            | 380                     | 5.21                 | yes              |
| EDTA (purple top)     | Magmax Core NA Purification | 200               | 90                 | 2.63            | 237                     | 1.62                 | yes              |
| EDTA (purple top)     | Nanobind CBB Big DNA kit    | 200               | 100                | 35.30           | 3530                    | 1.84                 | yes              |
| EDTA (purple top)     | PAXgene Blood DNA kit       | 1700              | 1000               | 10.80           | 10800                   | 1.98                 | no               |

**Table 1.** Effect of blood sample preservation agent on DNA yield. Blood for one canine (Yella) was drawn directly into two tubes containing either a proprietary preservation agent, or EDTA. Three kits were tested against a phenol-chloroform extraction (PCE) standard method. Input and output volumes for each kit are shown, along with actual recovered total DNA mass. NA stands for nucleic acid. EDTA stands for ethylenediaminetetraacetic acid.

119

| NA Isolation Method         | Total NA (ug) Mean | Total NA Std. Dev. | NA Quality (260/280) Mean | NA Quality (260/280) Std. Dev. | High-MW DNA? |
|-----------------------------|--------------------|--------------------|---------------------------|--------------------------------|--------------|
| PCE                         | 1.28               | 1.63               | 1.75                      | 3.10                           | yes          |
| Magmax Core NA Purification | 0.81               | <b>1.02</b>        | 1.57                      | 0.05                           | yes          |
| Nanobind CBB Big DNA kit    | 2.92               | 1.99               | <b>1.85</b>               | <b>0.03</b>                    | yes          |
| PAXgene Blood DNA kit       | <b>4.08</b>        | 4.85               | 1.73                      | 0.79                           | no           |

**Table 2.** Variability of NA (nucleic acid) isolation method across four canine blood samples preserved in 'purple top' tubes with EDTA (ethylenediaminetetraacetic acid). DNA from purple top tubes was extracted using either phenol-chloroform extraction (PCE), or three commercial kits (Magmax, Nanobind, and PAXgene). Bold values represent the best performance in a particular category.

120

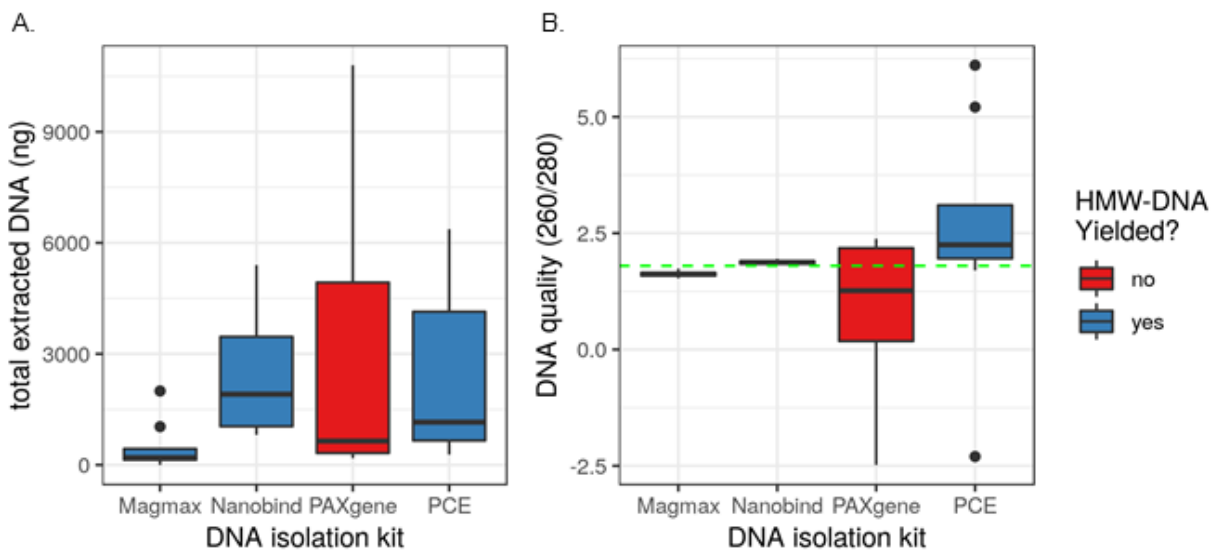

121

122 Figure 2. Total extracted DNA and DNA quality from four tested isolation kits. A) Total extracted DNA.

123 B) DNA quality; green line indicates the ideal 260/280 ratio for DNA purity at 1.80. Extractions from the

124 Nanobind kit had the most consistently high yield and quality.

125

### 126 *DNA Size-selection and Oxford Nanopore Sequencing*

127 Estimated average genome depth, based on the 2.32 Gb (gigabase) CanFam3.1 genome, for

128 combined read data from all eight ONT R9.4.1 flow cells was 22.65x (Table 3). Additional read statistics

129 for the combined read data are shown in Figure S2. The read N50 varied per flow cell dataset from 11,868

130 to 35,584 bp (Table 4). Interestingly, size selection with the Circulomics Short Read Eliminator kit prior

131 to library preparation did not always result in a higher read N50, and in fact the read N50 was actually

132 reduced when the kit was used prior to library preparation with the ligation kit (SQK-LSK109). Instead,

133 read N50 appears more influenced by library kit type, with the ligation kit having approximately 2x

134 higher median read N50 than the rapid kit (SQK-RAD004) (median read N50 of 24,750 and 12,094 bp,

135 respectively).

| Run # | Flowcell #      | ONT kit    | Total flow cells | Est. depth |
|-------|-----------------|------------|------------------|------------|
| 1     | 1,2             | SQK-LSK109 | 2                | 6.66       |
| 2     | 5,6             | SQK-LSK109 | 2                | 3.96       |
| 1+2   | 1,2,5,6         | SQK-LSK109 | 4                | 10.02      |
| 1     | 3,4             | SQK-RAD004 | 2                | 5.99       |
| 2     | 7,8             | SQK-RAD004 | 2                | 6.65       |
| 1+2   | 3,4,7,8         | SQK-RAD004 | 4                | 12.64      |
| 1     | 1,2,3,4         | RAD+LSK    | 4                | 12.05      |
| 2     | 5,6,7,8         | RAD+LSK    | 4                | 10.6       |
| 1+2   | 1,2,3,4,5,6,7,8 | RAD+LSK    | 8                | 22.65      |

**Table 3.** Breakdown of ONT sequencing runs, flow cells, library kit type, and estimated depth shown in Figure 1. Flow cell number from Table 2.

136

| Run | Flowcell # | ONT Kit     | Total basepairs | Total Reads | Read N50 | Mean Quality (Phred) |
|-----|------------|-------------|-----------------|-------------|----------|----------------------|
| 1   | 1          | SQK-LSK109  | 6,274,113,013   | 658,356     | 22,619   | 11.7                 |
| 1   | 2          | SQK-LSK109* | 7,769,391,385   | 934,471     | 18,562   | 12.2                 |
| 1   | 3          | SQK-RAD004  | 6,301,883,845   | 1,026,445   | 11,868   | 11.9                 |
| 1   | 4          | SQK-RAD004* | 7,573,765,689   | 1,216,984   | 12,320   | 11.3                 |
| 2   | 5          | SQK-LSK109  | 4,282,119,674   | 392,256     | 35,584   | 11.38                |
| 2   | 6          | SQK-LSK109  | 4,889,116,279   | 538,051     | 26,881   | 12.07                |
| 2   | 7          | SQK-RAD004  | 6,913,193,761   | 1,128,659   | 18,562   | 10.58                |
| 2   | 8          | SQK-RAD004  | 8,493,017,228   | 1,830,809   | 11,868   | 10.51                |

**Table 4.** Oxford Nanopore GridION sequencing run summaries using R9.4.1 flowcells. SQK-LSK109 is the ligation based library preparation kit. SQK-RAD004 is the transposon based rapid library preparation kit. \*Size selection on extracted DNA, prior to library preparation using the Circulomics short read eliminator kit.

137

### 138 *Illumina Sequencing of 10X Genomics Library and SuperNova Scaffolding*

139 Estimated average genome depth for trimmed reads data from four lanes of Illumina NovaSeq  
 140 was 87.80x (Table 5). SuperNova scaffolding was performed, which utilizes the 10X GEM barcoding  
 141 preparation for more accurate localization of short reads into contigs, under the assumption that reads  
 142 sharing the same barcode are derived from the same small number of HMW DNA fragments contained in  
 143 each GEM. The resulting scaffold contained 10,391 contigs, with a contig N50 and L50 of 94 kb and 22  
 144 contigs, respectively. The phase block size was greater than 5 Mb (megabase), and the scaffold N50 was  
 145 39 Mb. The assembly size of scaffolds greater than or equal to 10 kb was 2.33 Gb, which is in agreement  
 146 with other canine breed assemblies such as the Boxer (CanFam3.1 assembly at 2.31 Gb) and German  
 147 Shepherd (GCA\_008641245.1 assembly at 2.36 Gb).



| Run               | Lane | Paired Read | RAW       |               | TRIMMED   |               |
|-------------------|------|-------------|-----------|---------------|-----------|---------------|
|                   |      |             | Total bps | Total reads   | Total bps | Total reads   |
| 3                 | 1    | 1           | 2.36E+10  | 156,607,429   | 2.00E+10  | 155,880,038   |
| 3                 | 1    | 2           | 2.36E+10  | 156,607,429   | 2.35E+10  | 155,880,038   |
| 3                 | 2    | 1           | 2.29E+10  | 151,709,875   | 1.94E+10  | 151,035,675   |
| 3                 | 2    | 2           | 2.29E+10  | 151,709,875   | 2.27E+10  | 151,035,675   |
| 4                 | 1    | 1           | 3.16E+10  | 209,187,620   | 2.68E+10  | 208,419,758   |
| 4                 | 1    | 2           | 3.16E+10  | 209,187,620   | 3.14E+10  | 208,419,758   |
| 4                 | 2    | 1           | 3.24E+10  | 214,451,964   | 2.75E+10  | 213,618,769   |
| 4                 | 2    | 2           | 3.24E+10  | 214,451,964   | 3.22E+10  | 213,618,769   |
| <b>Totals</b>     |      |             | 2.21E+11  | 1,463,913,776 | 2.03E+11  | 1,457,908,480 |
| <b>Est. depth</b> |      |             | 95.38     |               | 87.80     |               |

**Table 5.** Illumina 10X library, 300 cycle sequencing run summaries. Insert size ~400 bp, these libraries were not prepared with the intention of joining (hence the 100bp gap between pairs). Quality and adapter trimming was performed with cutadapt (including clipping the first 22 bases from R1).

148

149 *De Novo Assembly*

150 The effect of estimated average read depth and library preparation kit (SQK-RAD004 or SQK-  
151 LSK109, i.e. rapid or ligation, respectively) on assembly contig count and total length was examined. The  
152 overriding factor for achieving the expected ~2.35 Gb assembly length is read depth, with the  
153 combination of reads from all eight flow cells achieving the expected length and about a magnitude  
154 reduction in total contigs compared to the CanFam3.1 assembly. ONT kit type had less of an effect on  
155 total length and contig count, with the ligation-only assemblies (at 10.02x depth) achieving a higher total  
156 length than the rapid-only assemblies (at 12.64x depth), even at ~2.5x lower estimated depth. However,  
157 the ligation kit assemblies appear more influenced by miniasm parameter selection compared to the rapid  
158 kit assemblies. A combination of kit types at a similar estimated depth (12.05x) seems to be the best of  
159 both worlds, with resulting assemblies having approximately the same number of contigs as the rapid-  
160 only assemblies (i.e. lower than ligation-only assemblies) at a comparable total length to the ligation-only  
161 assemblies.

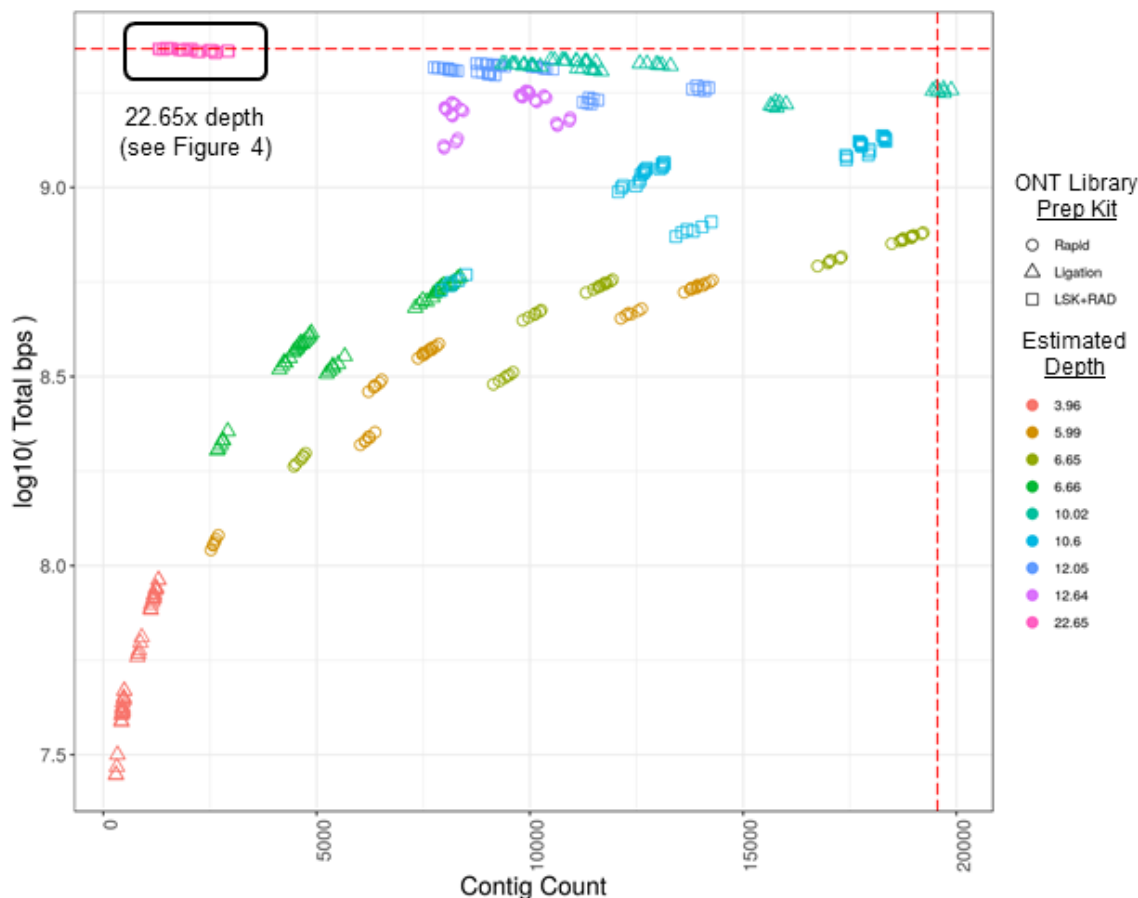

162

163 Figure 3. Genome assembly contig count versus total length of assembly. Each point represents a distinct  
164 assembly resulting from one of 144 unique miniasm parameter combinations. Sequence data from eight  
165 ONT flow cells are represented in the plot, four from each of the Ligation and Rapid library preparation  
166 kits (SQK-LSK109 and SQK-RAD004, respectively). See Table 3 for details linking ‘estimated depth’ to  
167 sequencing run and library kit. The estimated depth of 22.65 is a combination of reads from all eight flow  
168 cells (black boxed region in upper left, see Figure 4 for details regarding parameters). Estimated coverage  
169 is based on the total bps in the read set divided by the total length of CanFam3.1 assembly including Ns.  
170 Total bps of assembly approaches estimated total genome size as depth approaches 20x. Horizontal  
171 dashed red line - size of CanFam3.1 with N's (2,327,604,993 bp); vertical dashed red line - contig count  
172 (19,555) of CanFam3.1 chromosomal scaffolds broken at every occurrence of N. The following

173 ‘Estimated Depth(s)’ are from: the rapid kit only (5.99, 6.65, and 12.64); the ligation kit only (3.96, 6.66,  
174 10.02); and a combination of the two (10.60, 12.05, and 22.65).

175

176 Next, the effect of parameters available in the *de novo* assembler called miniasm on the ~23x  
177 estimated genome depth assemblies was assessed by examining the assembly cluster at the top left of  
178 Figure 3. Figure 4 shows 144 assemblies, which correspond to 144 unique parameter sets tested. It is  
179 important to note, however, that since the ‘m’ parameter had no effect on the assembly attributes of  
180 interest, there appears to be only 48 points in each plot. The following correlations and description of  
181 effect on assembly attributes is with respect to an increasing parameter value (see Fig 3 legend for  
182 description of parameters): m, not correlated, no effect; i, negative correlation, slightly less total bps but  
183 more contigs; s, negative correlation, significantly less total bps but more contigs; I, positive correlation,  
184 moderately more contigs and total bps; e, positive correlation, less contigs and less total bps.

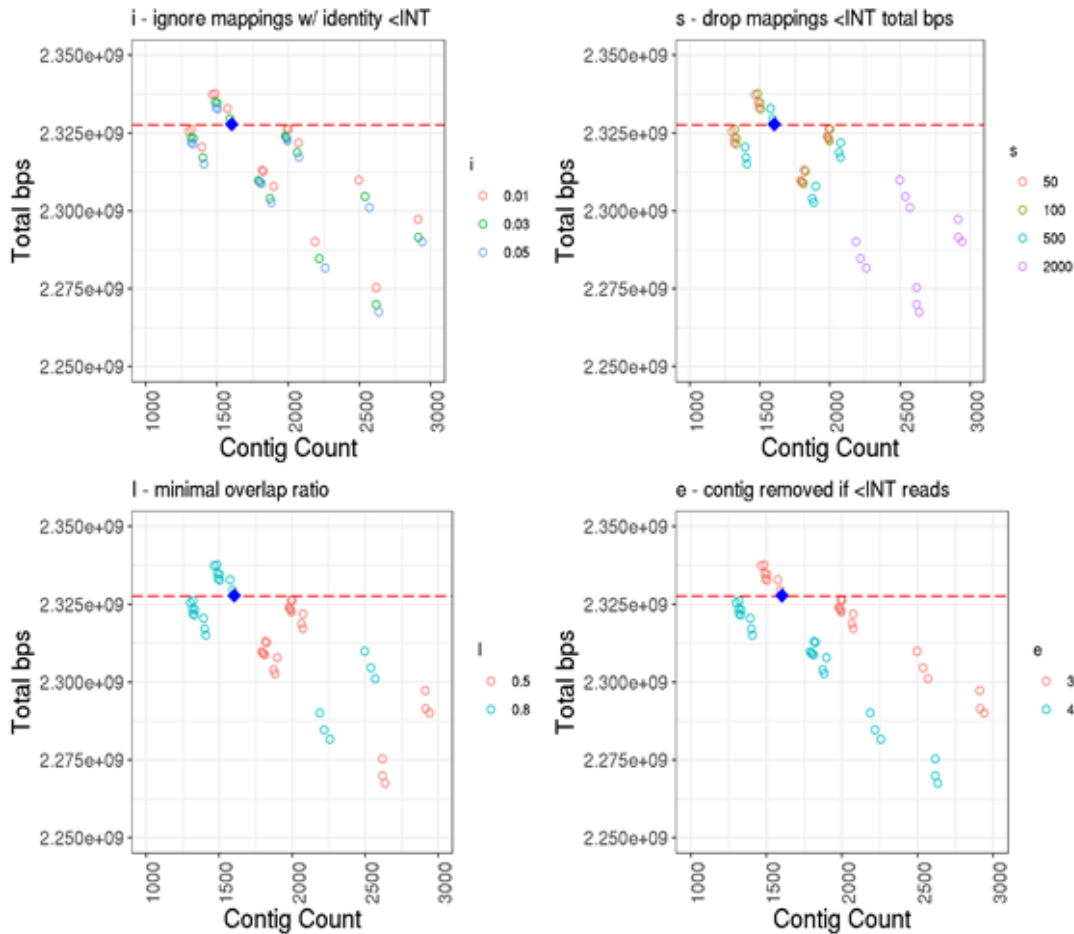

185

186 Figure 4. Genome assembly contig count versus total length of assembly for 22.65x estimated genome  
 187 depth data. Contig count calculated from counting number of headers in resulting assembly FASTA files,  
 188 and total length calculated from non-header character count. Zoomed in view of the top-left group of  
 189 assemblies from Figure 3, colored by parameter value and broken down by miniasm parameter type: i,  
 190 ignore mappings with identity less than INT (integer) identity; s, drop mapping less than INT total bps; l,  
 191 minimap overlap ratio; and e, contig is removed if it is generated from less than INT reads. Note that  
 192 miniasm parameter ‘m’ (for dropping read mappings with less than INT matching bps) is left out, as all  
 193 points for the three values used (25, 50, and 100) are all overlapping (i.e. ‘m’ has no effect on contig  
 194 count or total bps). Default parameters for miniasm are: m=100, i=0.05, s=1000, l=0.8, e=4. The blue  
 195 diamond indicates the down-selected assembly (v0.0 in Table 4a) used for polishing and final scaffolding,

196 miniasm parameters used: m=100, i=0.05, s=500, I=0.8, e=3. The red dashed line indicates the genome  
 197 size (with N's) of CanFam3.1.

198

199 The miniasm parameters used for the down-selected assembly that was subsequently polished and  
 200 used for genome scaffolding (Table 6, v0.0) were '-m 100 -i 0.05 -s 500 -I 0.8 -e 3'. These settings are  
 201 only slightly less stringent than the default settings (-m 100 -i 0.05 -s 1000 -I 0.8 -e 4), with mappings less  
 202 than 500 instead of 1000 total bases dropped (-s), and contigs generated from less than 3 instead of 4  
 203 reads removed (-e). The three parameters that remained at the default value are all more stringent  
 204 compared to other parameter set values tested. The assembly was selected based on its relatively low  
 205 contig count compared to that produced from other parameters sets, and a total assembly length  
 206 approaching that of CanFam3.1.

| Description               | Total Contigs | Largest Contig | Total Length (Gb) | GC Content | N50 (Mb) | L50 | N per 100Kb | BUSCO Scores |            |
|---------------------------|---------------|----------------|-------------------|------------|----------|-----|-------------|--------------|------------|
|                           |               |                |                   |            |          |     |             | Complete     | Fragmented |
| CF, GCF_000002285.3       | 82            | 123,773,608    | 2.328             | 41.06%     | 47.7     | 19  | 429         | 95.20%       | 2.50%      |
| GS, GCA_008641245.1       | 40            | 126,700,074    | 2.367             | 41.21%     | 64.5     | 14  | 236         | 93.70%       | 3.40%      |
| CFGS, RaGOO of CF onto GS | 40            | 123,868,242    | 2.328             | 41.06%     | 64.2     | 14  | 430         | 92.90%       | 3.80%      |
| JHMI 10X pseudohap        | 10,391        | 96,528,903     | 2.417             | 41.25%     | 39.2     | 22  | 1,901       | 92.70%       | 4.40%      |
| v0.0                      | 1,601         | 20,780,228     | 2.299             | 41.11%     | 5.5      | 130 | 0           | 0.20%        | 1.10%      |
| v0.1                      | 1,600         | 21,039,211     | 2.326             | 40.98%     | 5.6      | 130 | 0           | 32.00%       | 21.80%     |
| v0.2                      | 1,600         | 21,018,819     | 2.324             | 41.17%     | 5.6      | 130 | 0           | 94.80%       | 2.70%      |
| v0.3a                     | 1,412         | 21,088,418     | 2.394             | 41.30%     | 5.4      | 134 | 270         | 95.20%       | 2.60%      |
| v0.3b                     | 1,413         | 21,084,388     | 2.394             | 41.30%     | 5.4      | 134 | 270         | 95.20%       | 2.50%      |
| v0.4                      | 40            | 131,668,473    | 2.435             | 41.30%     | 64.9     | 14  | 1,972       | 92.40%       | 4.20%      |
| v1.0a                     | 40            | 138,659,542    | 2.394             | 41.30%     | 64.3     | 14  | 276         | 95.00%       | 2.50%      |
| v1.0b                     | 40            | 138,666,786    | 2.493             | 41.30%     | 64.3     | 14  | 276         | 95.10%       | 2.30%      |

207 **Table 6.** Assembly metrics of Yella dog genome through the scaffolding process, with related dog genome assembly metrics for comparison. BUSCO scores calculated using v3 with the mammalia\_odb9 dataset (missing % equals 100 - [Complete+Fragmented]).

208 Subsequent polishing of the v0.0 assembly using Racon resulted in large increases in 'BUSCO  
 209 complete' percentages, starting at only 0.20% in v0.0 (unpolished assembly), 32.00% in v0.1 (3x ONT  
 210 polishing), and 94.80% in v0.2 (2x Illumina polishing). After contig-level scaffolding of 10X contigs of  
 211 each haplotype onto v0.2, then chromosome-level scaffolding of each v0.3 haplotype onto the v0.4  
 212 scaffold, BUSCO complete percentages were further increased to 95.00% and 95.10% for v1.0a and  
 213 v1.0b, respectively (Table 6). These values are comparable to those achieved by CanFam3.1 at 95.20%.  
 214 Compared to the 10X SuperNova pseudohap assembly the N per 100 kb metric was much improved

215 through scaffolding onto the polished ONT scaffold (v0.2), from 1,901 down to only 275.90 and 275.77  
216 in the final assembly haplotypes v1.0a and b, respectively. This suggests that the contiguous regions of  
217 the final assembly haplotypes are similar, the only differences being SNPs and small indels. Additionally,  
218 the CanFam3.1 reference contains 429 N per 100 kb, significantly more than the v1.0 assembly. Although  
219 the German Shepherd assembly (GCA\_008641245.1) contains only 236 N per 100 kb, it only contains  
220 93.7% complete BUSCOs. Overall, the total length of v1.0a and v1.0b are similar, at approximately 2.39  
221 Gb, with the largest contig about 10% larger than that of either CanFam3.1 or the German Shepherd  
222 assembly.

### 223 *Mapping available public sequence data against reference genomes*

224 In order to evaluate performance as a new reference genome, publicly available Illumina WGS  
225 reads from ten LRs were obtained from NCBI's Sequence Read Archive (SRA). These are part of a 722  
226 canid dataset, each sequenced with Illumina WGS and deposited on SRA in 2018 (accessions available in  
227 Table S2). It is one of the first datasets to be available for researchers to explore genomic variability  
228 among canid species beyond SNP-chip-level variation (Plassais et al. 2019). Ten Labrador Retriever data  
229 sets were mapped against three different canid breed reference genomes: Boxer (CF, CanFam3.1,  
230 GCF\_000002285.3), German Shepard GS, GCA\_008641245.1), and the Labrador Retriever genome  
231 presented here (YA, Yella\_v1.0a, CP050567-CP050606). Figure 5 shows alignment rates and total high-  
232 quality variants called for each. In comparison to the Boxer and German Shepherd reference genomes,  
233 significantly more reads map to our Labrador Retriever reference, as expected (Figure 5A, paired  
234 Student's t-test; CF vs YA p-value = 2.457e-06, GS vs YA p-value = 1.397e-03). One area in which a  
235 breed-specific reference would be expected to excel is when calling variants. Assuming that a genome  
236 specific to a breed has the most conserved structural and SNP variation, the number of called variants  
237 should decrease when reads from the same breed are mapped versus reads derived from a different breed.  
238 This can clearly be seen in Figure 5B, which shows the number of high-quality variants called (those with  
239 Q-score  $\geq 30$ ) from the ten Labradors mapped against each reference. Interestingly, the Boxer and

240 Shepherd show similar performance when compared to total variants called in the Labrador, with the  
241 Labrador resolving an average of approximately 15% of variants called against the non-Labrador breeds  
242 (Table S2).

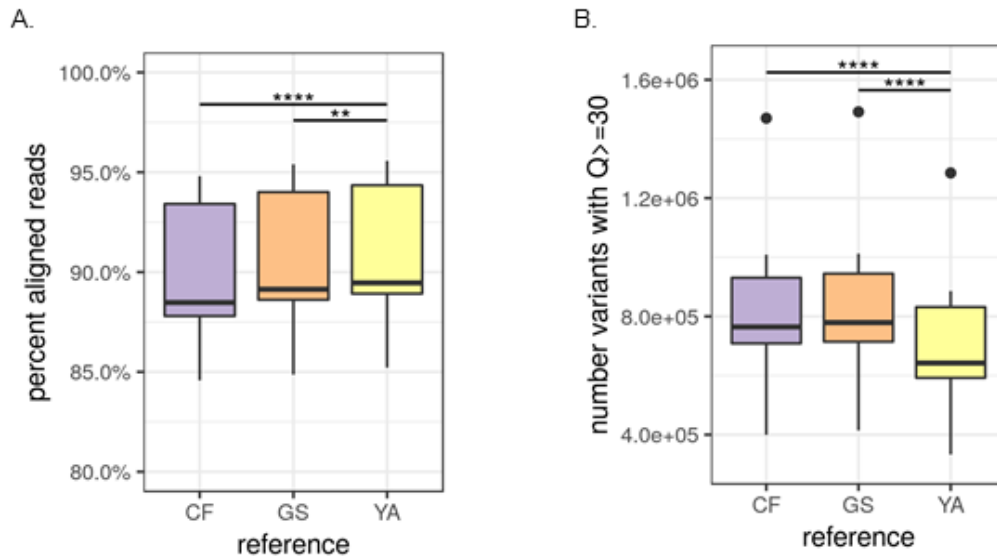

243

244 Figure 5. Alignment rates and total variants of ten Labrador Retriever Illumina sequence read data sets  
245 from SRA. Accessions and additional metrics can be found in Table S2. A) Reads alignment rates to CF  
246 (GCF\_000002285.3, CamFam3.1, Boxer breed), GS (GCA\_008641245.1, German Shepherd breed), and  
247 YA (Yella v1.0, Labrador Retriever breed) reference genomes (paired Student's t-test; CF vs YA p-value  
248 = 2.457e-06, GS vs YA p-value = 1.397e-03). B) Total variants detected at Q-score  $\geq 30$  in references  
249 (paired Student's t-test; CF vs YA p-value = 4.744e-06, GS vs YA p-value = 3.931e-06).

250

### 251 *Mitochondrial sequence and Y-chromosome*

252 The mitochondrial (MT) genome was easily recoverable from Yella and comparable to the  
253 CanFam3.1 MT reference (Figure S3). It was annotated and visualized using GeSeq (Tillich et al. 2017).  
254 The Y-chromosome was much more recalcitrant. Yella is a male Labrador Retriever, and while reads  
255 from the Y-chromosome could be detected via alignment to an existing partial Y chromosome reference

256 sequence, the Y-chromosome for Yella was not able to be resolved beyond an acceptable threshold for a  
257 published reference genome. This is similar to issues experienced across mammalian genomics, in which  
258 the short and highly repetitive nature of the Y-chromosome, along with its homology to the X-  
259 chromosome can make it difficult to detect and assemble (G. Li et al. 2013; Oetjens et al. 2018; Carvalho  
260 and Clark 2013; Rangavittal et al. 2019).

261

## 262 **DISCUSSION**

263 Over the past two decades, much of the population-wide haplotyping of humans and dogs  
264 necessitated using SNPs derived from a single reference genome. In both cases, the starting references (a  
265 European American and a Boxer, respectively) would not be useful for ethnic stratification (for humans)  
266 or breed stratification (for canids). This can lead to an influx of false positives and false negatives when  
267 calling variants for a mixed population. In addition, the reliance on SNPs has failed to capture structural  
268 variation among populations, which has also not been well captured by array methodologies. One way to  
269 address both of these issues is the generation of a ‘stratified reference’ with cheaper technologies, such as  
270 short-read WGS, prior to initiating a GWAS. Here we provide the wet lab and bioinformatic methodology  
271 to generate a high-resolution mammalian reference genome for approximately \$10K. Offsetting these  
272 costs would be the improved resolution of individuals mapped to the reference, and the elimination of a  
273 large proportion of variant call noise. We show that publicly-available canids generated with WGS can be  
274 re-mapped, allowing more comparative controls to be utilized for a GWAS without further expenditure.  
275 Investigators using this approach could affordably generate a high-quality GWAS using a high-resolution,  
276 stratified reference, and a population genotyped using WGS. In canids, this could allow for breed-specific  
277 elucidation of structural variants, and, more importantly, the determination of their frequencies within that  
278 breed. As frequencies of SNPs and structural variants are combined, this data could then be applied  
279 towards the ultimate genomic reference goal: the *Canis lupus familiaris* pan-genome.

280



## 281 **METHODS**

### 282 *Sample collection*

283 Blood samples were obtained from four canines, and collected in both PAXGene Blood DNA  
284 tubes (761115, PreAnalytix) and ‘purple top’ EDTA (ethylenediaminetetraacetic acid) Vacutainer tubes  
285 (367863, BD Biosciences). Blood samples were stored at 4C upon arrival and processed within 2 days.  
286 Samples were split between four different DNA extraction protocols (described below) to test extraction  
287 efficiency.

### 288 *DNA extraction and analysis of HMW-DNA*

289 Four DNA extraction protocols were used to process blood samples: (1) the Dog Genome Project  
290 Protocol (“Online Research Resources Developed at NHGRI” n.d.) which employs a phenol-chloroform  
291 extraction (PCE), (2) the PAXgene Blood DNA kit (761133, PreAnalytix), (3) the MagMax Core NA kit  
292 (A32700, Applied BioScience), and (4) the Nanobind CBB Big DNA Kit (Beta Ultra-High Molecular  
293 Weight DNA Extraction Protocol V1.4, Circulomics). Blood samples were split based on input  
294 requirements for each kit and processed according to the manufacturer’s protocol. Nucleic acid extracts  
295 were then quantified by Qubit 4.0 using the Broad Range dsDNA kit (Q32853, ThermoFisher), and for  
296 nucleic acid purity using the Nanodrop 2000 (ThermoFisher Scientific). HMW-DNA (High Molecular  
297 Weight DNA) was visualized using Pulsed Field Gel Electrophoresis (PFGE) on a Blue Pippin Pulse, set  
298 on 70V for 20 hours at room temperature. Samples were stored a -20°C until quantified for sequencing  
299 library preparation.

### 300 *ONT library preparation and sequencing*

301 DNA from the Nanobind CBB Big DNA kit and the MagMax Core NA kit for both PAXgene and  
302 ‘purple top’ EDTA tubes were combined to create a single sample for Oxford Nanopore Technologies  
303 library preparation. Half of this sample was used in the Short Read Eliminator Kit (SS-100-101-01,  
304 Circulomics, Inc., MD, USA) to test the effect of size-selection on read N50, resulting in a size-selected  
305 sample. The size-selected and non-size-selected samples were then split between the Rapid Sequencing

306 Kit (SQK-RAD004, Oxford Nanopore Technologies) and the Ligation Sequencing Kit (SQK-LSK109,  
307 Oxford Nanopore Technologies) to test the effect of library preparation on read N50, resulting in a total of  
308 four unique libraries. Each library was then loaded onto an R9.4.1 flow cell and sequenced in parallel on  
309 the ONT GridION platform. It was determined that size-selection did not have the desired effect of  
310 increasing read N50, and four additional non size-selected libraries were prepared (two SQK-RAD004  
311 and two SQK-LSK109) to achieve a target depth of at least 20x. The output of all eight flow cells  
312 produced a combined total of approximately 22.7x depth.

### 313 *10X Genomics linked-read sequencing and assembly*

314 For the 10X Genomics assembly, high molecular weight genomic DNA was isolated from whole  
315 blood stored in the PAXgene proprietary media using the Nanobind CBB Big DNA kit (Circulomics, Inc.,  
316 MD, USA) and short fragments filtered out using the Circulomics Short Read Eliminator kit. Genomic  
317 DNA concentration and purity were assessed with a Qubit 2.0 Fluorometer (ThermoFisher Scientific,  
318 MA, USA) and NanoDrop 2000 spectrophotometer (ThermoFisher Scientific, MA, USA). Capillary  
319 electrophoresis was carried out using a Fragment Analyzer (Agilent Technologies, CA, USA) to ensure  
320 that the isolated DNA had a minimum molecule length of 40 kb. Genomic DNA was diluted to  
321 approximately 1.2 ng/ $\mu$ l and libraries were prepared using Chromium Genome Reagents Kits Version 2  
322 and the 10X Genomics Chromium Controller instrument fitted with a micro-fluidic Genome Chip (10X  
323 Genomics, CA, USA). DNA molecules were captured in Gel Bead-In-Emulsions (GEMs) and nick-  
324 translated using bead-specific unique molecular identifiers (UMIs; Chromium Genome Reagents Kit  
325 Version 2 User Guide) and size and concentration determined using an Agilent 2100 Bioanalyzer DNA  
326 1000 chip (Agilent Technologies, CA, USA). Libraries were then sequenced on an Illumina NovaSeq  
327 6000 System following the manufacturer's protocols (Illumina, CA, USA) to produce >95x read depth  
328 using paired-end 150 bp reads. The reads were assembled into phased pseudo-haplotypes using  
329 Supernova Version 2.0 (10X Genomics, CA, USA).

### 330 *Genome assembly*

331 As discussed above, two sequencing platforms were employed to sequence and assemble the  
332 yellow Labrador Retriever mixed breed *Canis lupus familiaris* phased reference genome; HMW  
333 sequencing using R9.4.1 flow cells on ONT's GridION platform, and 10X Genomics linked-read  
334 sequencing on Illumina's NovaSeq platform. The *de novo* assembly workflow (Figure 6) starts with  
335 generating an overlapping read file from all ONT data using minimap2 (version 2.15-r911-dirty) (H. Li  
336 2018). These super-contiguous sequences and the original input read file were then assembled using  
337 miniasm (version 0.3-r179) (H. Li 2018). In order to find the best initial assembly for polishing and  
338 scaffolding, a range of miniasm parameter combinations were executed as part of this step, and each  
339 resulting assembly evaluated for total contig count and length. A five feature parameter space for miniasm  
340 was explored, yielding 144 unique parameter tests (see Figure x for specific values used for parameters  
341 m[3x], i[3x], s[4x], l[2x], and e[2x]).

| Version | Description                                               |
|---------|-----------------------------------------------------------|
| CFGS    | RaGOO of CanFam3.1 onto German Shepherd scaffolds         |
| 0.0     | raw assembly from miniasm                                 |
| 0.1     | v0.0 + 3x racon polishing with ONT reads                  |
| 0.2     | v0.1 + 2x racon polishing with illumina 10X reads         |
| 0.3a    | RaGOO of 10X pseudohap2.1 contigs onto v0.2               |
| 0.3b    | RaGOO of 10X pseudohap2.2 contigs onto v0.2               |
| 0.4     | RaGOO of JHMI 10X psuedohap scaffolds onto CFGS scaffolds |
| 1.0a    | RaGOO of v0.3a onto v0.4                                  |
| 1.0b    | RaGOO of v0.3b onto v0.4                                  |

**Table 7.** Versions of Yella dog genome assembly. Starting with v0.0, the assembly from miniasm parameter set: m100, i0.05, s500, l0.8, e3 (if not listed, default value was used). The RaGOO generated CFGS assembly is the primary reference used for chromosomal scale

342

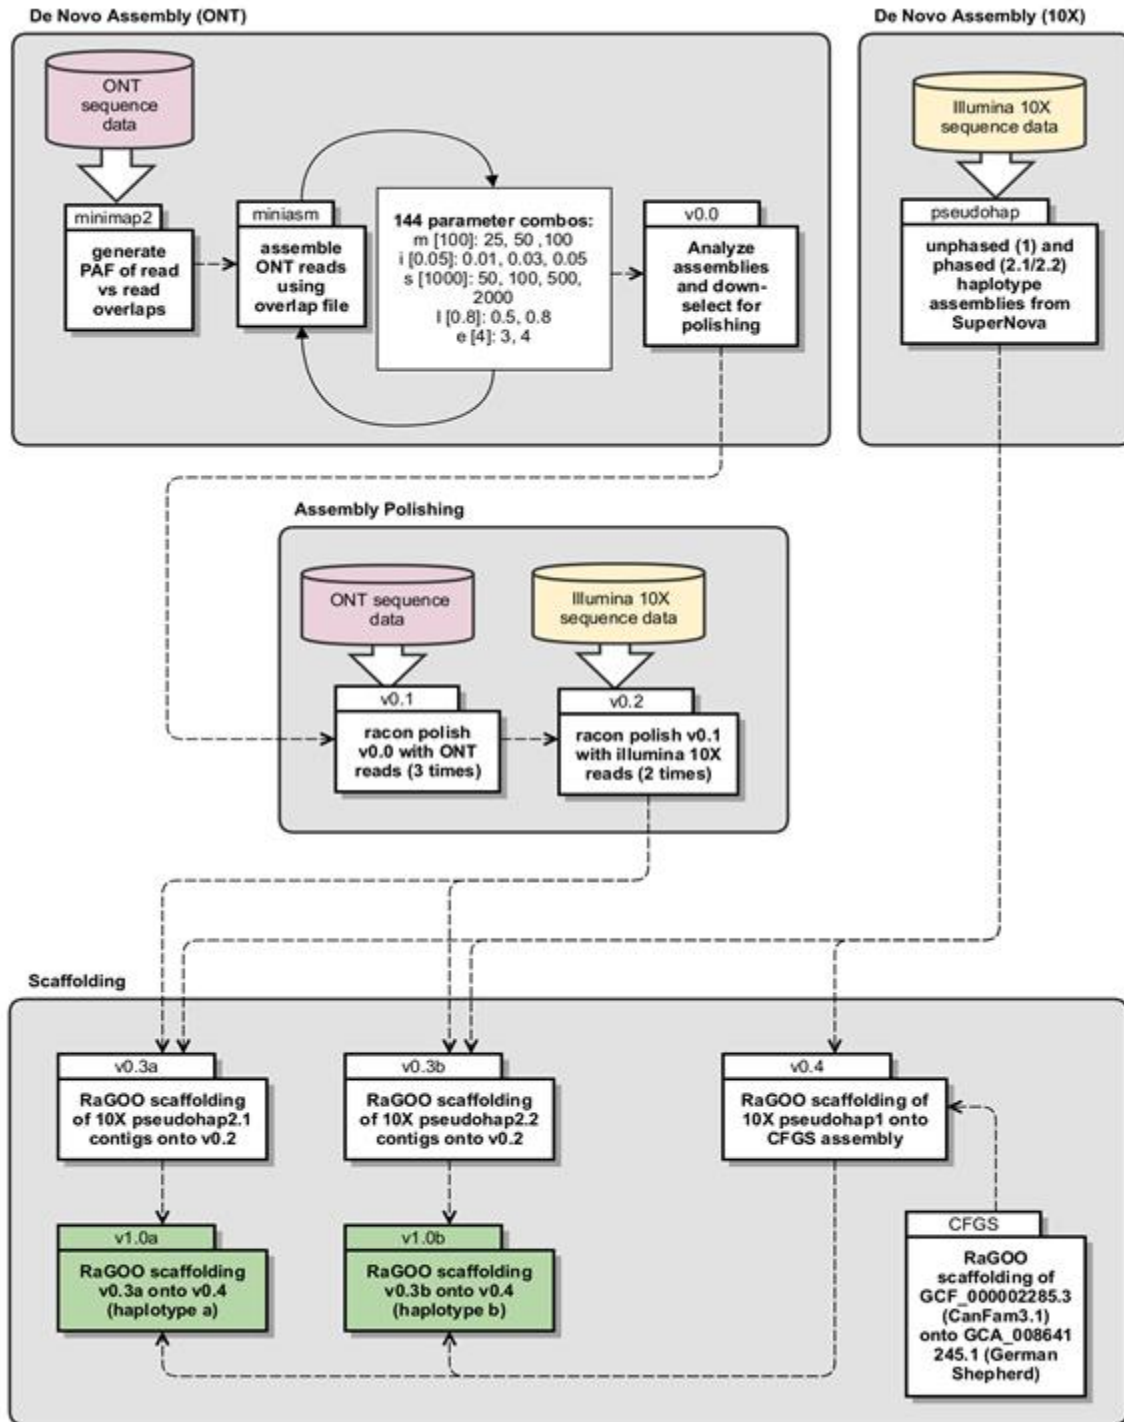

343

344 Figure 6. Diagram of phased assembly pipeline. Divided into four primary sections: De Novo Assembly

345 (ONT), De Novo Assembly (10X), Assembly Polishing, and Scaffolding.

346

347           After assembly down-selection (v0.0, see Results for specific parameter set), the raw contig  
348 correction by rapid assembly methods tool Racon (version v1.4.3) was used for polishing; three rounds  
349 with ONT reads (v0.1) followed by two rounds with Illumina 10X reads (v0.2) (Vaser et al. 2017). The  
350 read QC tool cutadapt (version 2.5) was used to clip the first 22 bps containing the GEM barcode from the  
351 Illumina 10X reads prior to use as polishing input (Martin 2011). Additionally, a base call quality  
352 threshold of Phred 20 and a minimum length of 50 bp were used during cutadapt QC processing. In order  
353 to produce phased haplotypes, the SuperNova pseudohap2.1 and 2.2 contig sets were scaffolded  
354 separately onto v0.2, producing v0.3a and b, respectively (Table 7). The fast and accurate reference-  
355 guided scaffolding tool RaGOO (version v1.1) was used to accomplish all scaffolding (Alonge et al.  
356 2019). Alongside polishing and pseudohap phasing of the ONT scaffolds, CanFam3.1  
357 (GCF\_000002285.3) was scaffolded onto the newly assembled German Shepherd genome  
358 (GCA\_008641245.1) (Field et al. 2020) because the latter provides superior chromosomal context for the  
359 more fragmented but highly annotated CanFam3.1 genome (CFGS). Next, the unphased SuperNova  
360 pseudohap1 contigs were scaffolded onto the CFGS assembly to correct for potential structural variation  
361 between breeds, and more accurately reflect the structure of the Labrador Retriever breed (v0.4). Lastly, a  
362 final phased v1.0a and b assembly was produced by scaffolding v0.3a and b onto v0.4. Assembly  
363 statistics were calculated using QUAST-LG (version v5.0.2), and genome completeness was assessed  
364 using BUSCO (version v3, Benchmarking sets of Universal Single-Copy Orthologs) with the  
365 mammalia\_odb9 dataset ([https://busco.ezlab.org/datasets/mammalia\\_odb9.tar.gz](https://busco.ezlab.org/datasets/mammalia_odb9.tar.gz)) (Mikheenko et al. 2018;  
366 Simão et al. 2015).

### 367 *Alignment and variant calling*

368           Reads from SRA were aligned to the three canine reference genomes shown in Figure 5 using  
369 default parameter settings for the graph-based aligner HISAT2 (Kim et al. 2019). Secondary and  
370 supplementary alignments were then filtered using samtools with parameters "-F0x4 -F0x100 -F0x800"

371 (Li et al. 2009). Variant calling was performed using default parameters for "bcftools mpileup" and  
372 "bcftools call", then filtering out variant calls with QUAL less than 30 (Li 2011).

373

#### 374 **DATA ACCESS**

375 The sequence read data and assemblies generated in this study have been submitted to the NCBI  
376 BioProject database (<https://www.ncbi.nlm.nih.gov/bioproject/>) under accession number PRJNA610592.  
377 All samples used in this study are under BioSample SAMN14279123. The primary haplotype FASTAs  
378 are under BioProject PRJNA610232 and differentiated from the alternative haplotype with an 'a' at the  
379 end of header names excluding the MT header (40 sequences, MT included, GenBank accessions  
380 CP050567.1 - CP050606.1). The alternative haplotype FASTAs are under BioProject PRJNA610230 and  
381 differentiated from the primary with a 'b' at the end of header names (39 sequences, MT omitted,  
382 GenBank accessions CP050607.1 - CP050645.1).

383

#### 384 **ACKNOWLEDGEMENTS**

385 Funding for this project was provided by the Department of Homeland Security (DHS) Science  
386 and Technology Directorate (S&T), Contract No. 70RSAT19CB0000002. Karen Meidenbauer, DVM, is  
387 acknowledged for her technical leadership and expertise, as well as her participation drawing blood,  
388 which was transported via shippable pelican case with all lab equipment, reagents, and samples. David  
389 Deglau and Michael House are gratefully acknowledged for project and program management,  
390 respectively. Jody Proescher is acknowledged for her critical review of and editorial feedback for the  
391 manuscript.

392

#### 393 **AUTHOR CONTRIBUTIONS**

394 RP performed all bioinformatics analysis and generated all figures and tables, and large portions  
395 of the manuscript. EF and KV performed wet lab studies including high molecular weight DNA

396 extractions, library preparation, and nanopore sequencing. DM performed all 10X Genomics and Illumina  
397 NovaSeq experiments and bioinformatics analysis. AS funded the 10X Genomic and NovaSeq  
398 experiments, and contributed intellectually to the study integration of Illumina and nanopore data. CB  
399 proposed and established the initial study, provided scientific leadership, and contributed large portions of  
400 the manuscript.

401

#### 402 **DISCLOSURE DECLARATION**

403 The authors declare no conflict of interest. DISTRIBUTION STATEMENT A - APPROVED FOR  
404 PUBLIC RELEASE; DISTRIBUTION IS UNLIMITED.

405

#### 406 **REFERENCES**

Alonge, Michael, Sebastian Soyk, Srividya Ramakrishnan, Xingang Wang, Sara Goodwin, Fritz J.

Sedlazeck, Zachary B. Lippman, and Michael C. Schatz. 2019. “RaGOO: Fast and Accurate Reference-Guided Scaffolding of Draft Genomes.” *Genome Biology* 20 (1): 224.

<https://doi.org/10.1186/s13059-019-1829-6>. “Canis Lupus Familiaris - Ensembl Genome Browser 100.” n.d. Accessed May 5, 2020.

[https://useast.ensembl.org/Canis\\_lupus\\_familiaris/Info/Annotation](https://useast.ensembl.org/Canis_lupus_familiaris/Info/Annotation).

Carvalho, Antonio Bernardo, and Andrew G. Clark. 2013. “Efficient Identification of Y Chromosome Sequences in the Human and Drosophila Genomes.” *Genome Research* 23 (11): 1894–1907.

<https://doi.org/10.1101/gr.156034.113>.

“DNA Sequencing Costs: Data.” n.d. Genome.Gov. Accessed May 5, 2020.

<https://www.genome.gov/about-genomics/fact-sheets/DNA-Sequencing-Costs-Data>.

Field, Matt A., Benjamin D. Rosen, Olga Dudchenko, Eva K. F. Chan, Andre E. Minoche, Richard J.

Edwards, Kirston Barton, et al. 2020. “Canfam\_GSD: De Novo Chromosome-Length Genome Assembly of the German Shepherd Dog (*Canis Lupus Familiaris*) Using a Combination of Long

- Reads, Optical Mapping, and Hi-C.” *GigaScience* 9 (4).  
<https://doi.org/10.1093/gigascience/giaa027>.
- Green, Eric D., and Mark S. Guyer. 2011. “Charting a Course for Genomic Medicine from Base Pairs to Bedside.” *Nature* 470 (7333): 204–13. <https://doi.org/10.1038/nature09764>.
- “Human Genome Project FAQ.” n.d. Genome.Gov. Accessed May 5, 2020.  
<https://www.genome.gov/human-genome-project/Completion-FAQ>.
- Kim, Kyung Seok, Seong Eun Lee, Ho Won Jeong, and Ji Hong Ha. 1998. “The Complete Nucleotide Sequence of the Domestic Dog (*Canis Familiaris*) Mitochondrial Genome.” *Molecular Phylogenetics and Evolution* 10 (2): 210–20. <https://doi.org/10.1006/mpev.1998.0513>.
- Kim, Daehwan, Joseph M. Paggi, Chanhee Park, Christopher Bennett, and Steven L. Salzberg. 2019. “Graph-Based Genome Alignment and Genotyping with HISAT2 and HISAT-Genotype.” *Nature Biotechnology* 37 (8): 907–15. <https://doi.org/10.1038/s41587-019-0201-4>.
- Li, Gang, Brian W. Davis, Terje Raudsepp, Alison J. Pearks Wilkerson, Victor C. Mason, Malcolm Ferguson-Smith, Patricia C. O’Brien, Paul D. Waters, and William J. Murphy. 2013. “Comparative Analysis of Mammalian Y Chromosomes Illuminates Ancestral Structure and Lineage-Specific Evolution.” *Genome Research* 23 (9): 1486–95.  
<https://doi.org/10.1101/gr.154286.112>.
- Li, Heng. 2011. “A Statistical Framework for SNP Calling, Mutation Discovery, Association Mapping and Population Genetical Parameter Estimation from Sequencing Data.” *Bioinformatics* 27 (21): 2987–93. <https://doi.org/10.1093/bioinformatics/btr509>.
- Li, Heng. 2018. “Minimap2: Pairwise Alignment for Nucleotide Sequences.” *Bioinformatics* 34 (18): 3094–3100. <https://doi.org/10.1093/bioinformatics/bty191>.
- Li, Heng, Bob Handsaker, Alec Wysoker, Tim Fennell, Jue Ruan, Nils Homer, Gabor Marth, Goncalo Abecasis, and Richard Durbin. 2009. “The Sequence Alignment/Map Format and SAMtools.” *Bioinformatics* 25 (16): 2078–79. <https://doi.org/10.1093/bioinformatics/btp352>.



Lindblad-Toh, Kerstin, Claire M. Wade, Tarjei S. Mikkelsen, Elinor K. Karlsson, David B. Jaffe, Michael

Kamal, Michele Clamp, et al. 2005. “Genome Sequence, Comparative Analysis and Haplotype Structure of the Domestic Dog.” *Nature* 438 (7069): 803–19.

<https://doi.org/10.1038/nature04338>.

Manolio, Teri A., Francis S. Collins, Nancy J. Cox, David B. Goldstein, Lucia A. Hindorff, David J.

Hunter, Mark I. McCarthy, et al. 2009. “Finding the Missing Heritability of Complex Diseases.”

*Nature* 461 (7265): 747–53. <https://doi.org/10.1038/nature08494>.

Martin, Marcel. 2011. “Cutadapt Removes Adapter Sequences from High-Throughput Sequencing

Reads.” *EMBnet.Journal* 17 (1): 10–12. <https://doi.org/10.14806/ej.17.1.200>.

Mikheenko, Alla, Andrey Prjibelski, Vladislav Saveliev, Dmitry Antipov, and Alexey Gurevich. 2018.

“Versatile Genome Assembly Evaluation with QUAST-LG.” *Bioinformatics* 34 (13): i142–50.

<https://doi.org/10.1093/bioinformatics/bty266>.

Oetjens, Matthew T., Axel Martin, Krishna R. Veeramah, and Jeffrey M. Kidd. 2018. “Analysis of the

Canid Y-Chromosome Phylogeny Using Short-Read Sequencing Data Reveals the Presence of Distinct Haplogroups among Neolithic European Dogs.” *BMC Genomics* 19 (1): 350.

<https://doi.org/10.1186/s12864-018-4749-z>.

“Online Research Resources Developed at NHGRI.” n.d. Online Research Resources Developed at

NHGRI. Accessed May 5, 2020. <https://research.nhgri.nih.gov/>.

Plassais, Jocelyn, Jaemin Kim, Brian W. Davis, Danielle M. Karyadi, Andrew N. Hogan, Alex C. Harris,

Brennan Decker, Heidi G. Parker, and Elaine A. Ostrander. 2019. “Whole Genome Sequencing of Canids Reveals Genomic Regions under Selection and Variants Influencing Morphology.”

*Nature Communications* 10 (1): 1–14. <https://doi.org/10.1038/s41467-019-09373-w>.

Rangavittal, Samarth, Natasha Stopa, Marta Tomaszewicz, Kristoffer Sahlin, Kateryna D. Makova, and

Paul Medvedev. 2019. “DiscoverY: A Classifier for Identifying Y Chromosome Sequences in

Male Assemblies.” *BMC Genomics* 20 (1): 641. <https://doi.org/10.1186/s12864-019-5996-3>.

Simão, Felipe A., Robert M. Waterhouse, Panagiotis Ioannidis, Evgenia V. Kriventseva, and Evgeny M.

Zdobnov. 2015. “BUSCO: Assessing Genome Assembly and Annotation Completeness with Single-Copy Orthologs.” *Bioinformatics* 31 (19): 3210–12.

<https://doi.org/10.1093/bioinformatics/btv351>.

Tillich, Michael, Pascal Lehwark, Tommaso Pellizzer, Elena S. Ulbricht-Jones, Axel Fischer, Ralph

Bock, and Stephan Greiner. 2017. “GeSeq – Versatile and Accurate Annotation of Organelle Genomes.” *Nucleic Acids Research* 45 (Web Server issue): W6–11.

<https://doi.org/10.1093/nar/gkx391>.

Vaser, Robert, Ivan Sovic, Niranjan Nagarajan, and Mile Sikic. 2017. “Fast and Accurate de Novo

Genome Assembly from Long Uncorrected Reads.” *Genome Research*, January, gr.214270.116.

<https://doi.org/10.1101/gr.214270.116>.

Venter, J. Craig, Mark D. Adams, Eugene W. Myers, Peter W. Li, Richard J. Mural, Granger G. Sutton,

Hamilton O. Smith, et al. 2001. “The Sequence of the Human Genome.” *Science* 291 (5507):

1304–51. <https://doi.org/10.1126/science.1058040>.

Young, Alexander I. 2019. “Solving the Missing Heritability Problem.” *PLOS Genetics* 15 (6): e1008222.

<https://doi.org/10.1371/journal.pgen.1008222>.

407

408 **Acronyms**

409 bp - base pair

410 BUSCO - Benchmarking sets of Universal Single-Copy Orthologs

411 CFGS - scaffold of CanFam3.1 (GCF\_000002285.3) on German Shepherd genome (GCA\_008641245.1)

412 EDTA - ethylenediaminetetraacetic acid

413 Gb - gigabase

414 GWAS – Genome Wide Association Study

415 HMW-DNA – High Molecular Weight DNA

- 416 kb - kilobase  
417 NHGRI – National Human Genome Research Institute  
418 ONT - Oxford Nanopore Technologies  
419 PCE – Phenol-Chloroform Extraction  
420 PFGE - Pulsed Field Gel Electrophoresis  
421 SNP – Single Nucleotide Polymorphism  
422 WGS – Whole Genome Sequencing  
423  
424 **SUPPLEMENTAL MATERIAL**  
425

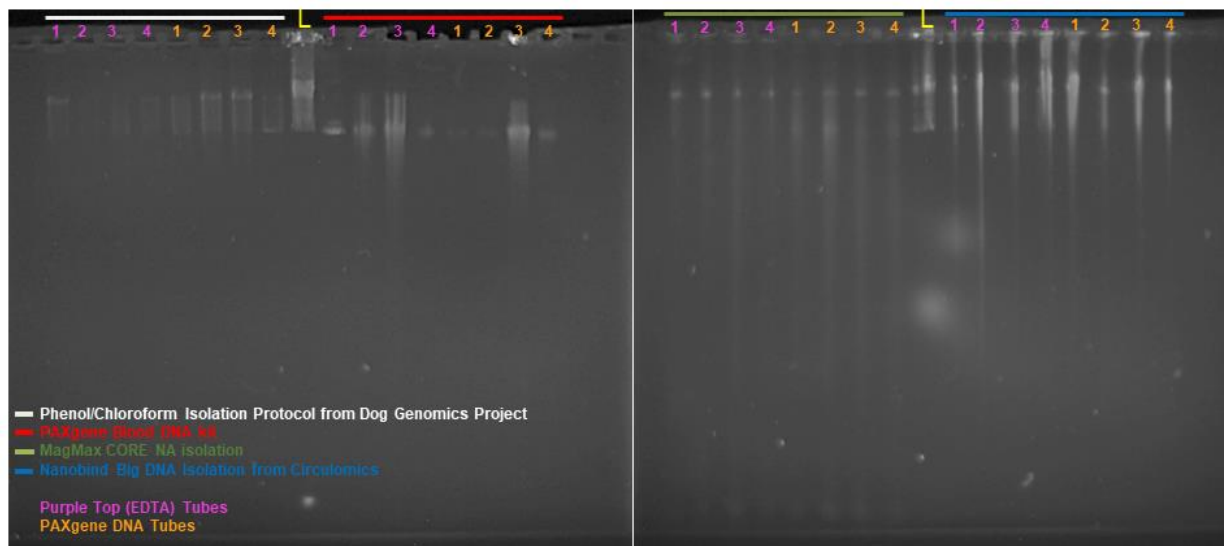

Figure S1. PFGE visualization of HMW-DNA extracted from four different extraction methods (PCE, PAXgene, MagMax, and Nanobind) using blood stored in two different preservation agents (PAXgene and EDTA). Samples are from four dogs (numbered across the top 1-4). The lambda ladder is in the middle lane of each gel, indicated by a yellow 'L' (48.5Kb - 1Mb, 18 bands at 48.5Kb steps). The PAXgene extraction kit is the only kit that failed to yield HMW-DNA. PFGE run at 70V for 20 hours.

426

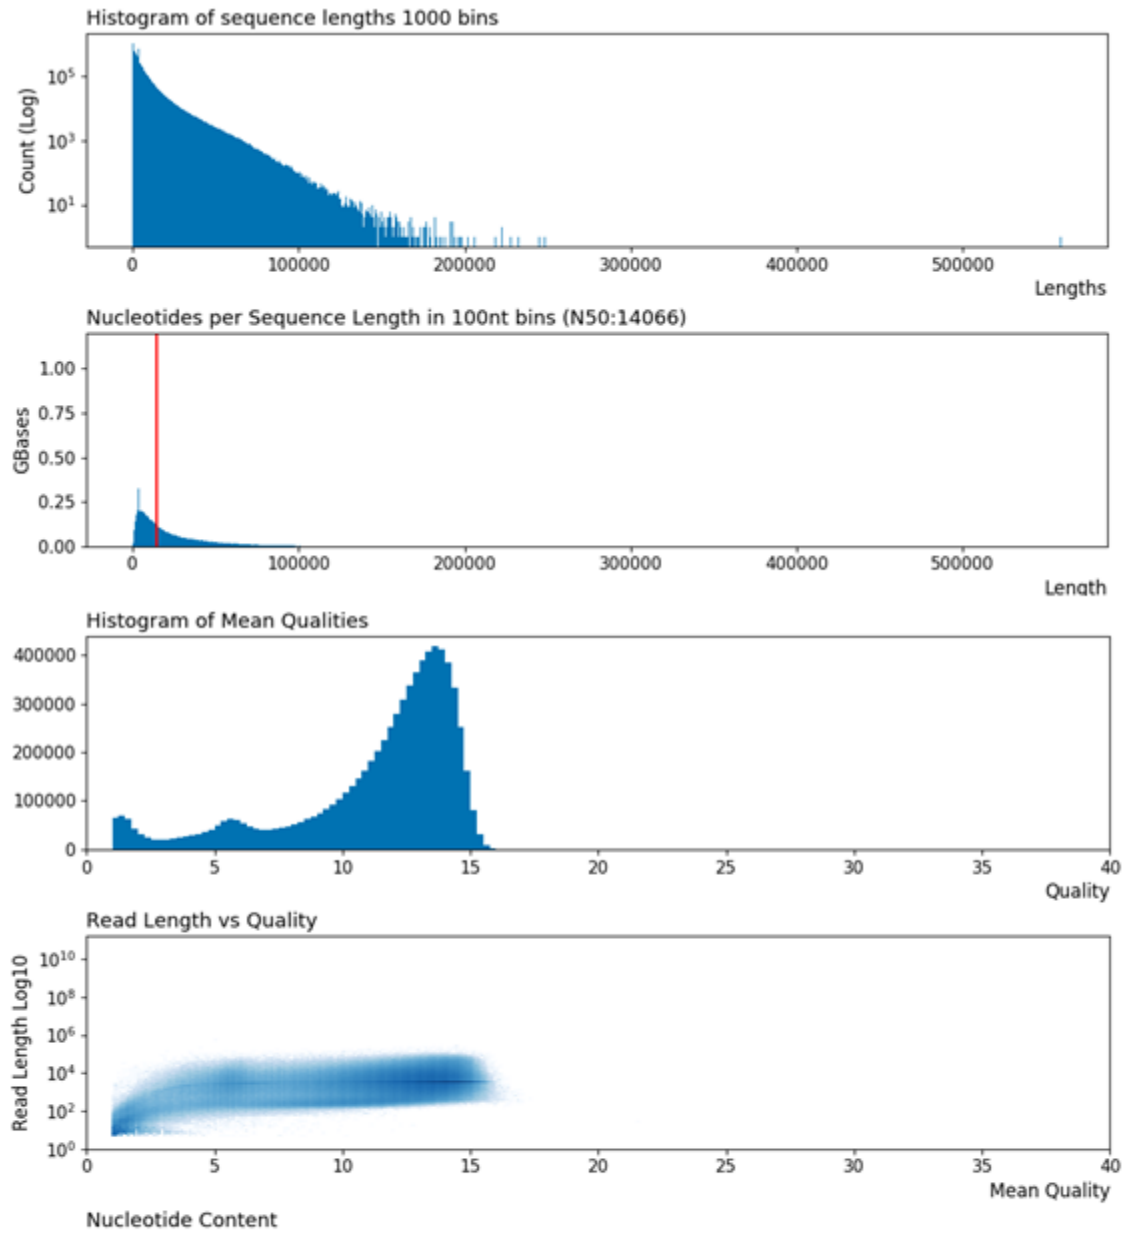

Figure S2. Sequence length and base call quality distributions of combined read data from all eight ONT flow cells used to generate at least 20x depth across the approximately 2.3Gb canine genome.

427

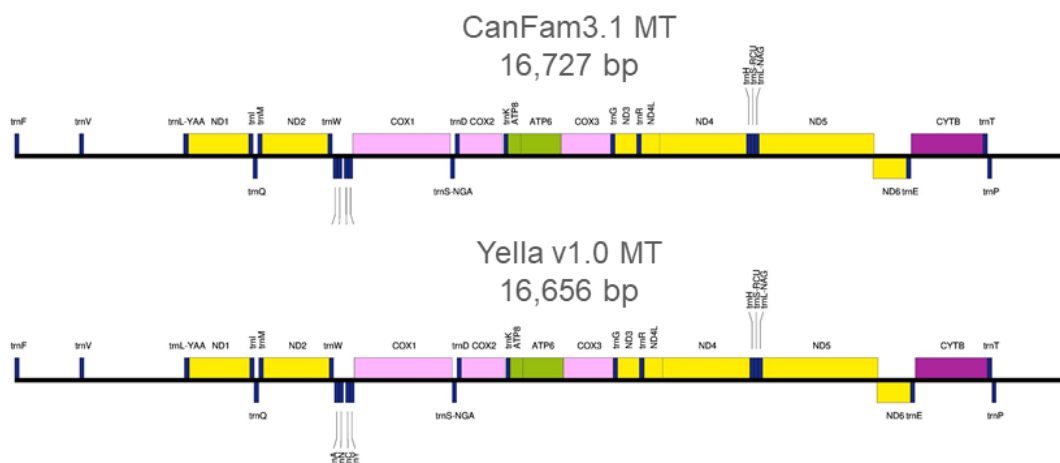

Figure S3. Sequence annotation maps of refseq canine mitochondrial sequence (top) and Yella v1.0 mitochondrial sequence (bottom). Maps generated from GeSeq's Chlorobox annotation and visualization web tool (reference below). Alignment of Yella MT to refseq MT reveals 3 bps of insertions and 74 bps of deletion (alignment CIGAR: 2678M117233M216327M50D36M24D379M). Needleman-Wunsch pairwise alignment results 99.41 identity and similarity between these MT sequences.

428

| Sample ID | Dog ID | Storage Agent          | Isolation Kit | Isolation Volume (uL) | Extracted NA Concentration (ng/uL) | Total Extracted NA (ng) | Total NA Normalized to Kit Input Volume (ng) | NA Quality (260/280) | NA Quality (260/230) | HMW DNA Yielded? |
|-----------|--------|------------------------|---------------|-----------------------|------------------------------------|-------------------------|----------------------------------------------|----------------------|----------------------|------------------|
| 12928     | 5      | purple top tube (EDTA) | PCE           | 1000                  | 3.7                                | 3700                    | 3.7                                          | 2.4                  | 4.6                  | yes              |
| 12929     | 5      | purple top tube (EDTA) | PAXgene       | 1000                  | 0.36                               | 360                     | 0.36                                         | 0.55                 | 0.08                 | no               |
| 12930     | 5      | purple top tube (EDTA) | Nanobind      | 100                   | 19.5                               | 1950                    | 19.5                                         | 1.89                 | 1.25                 | yes              |
| 12931     | 5      | purple top tube (EDTA) | Magmax        | 90                    | n/a                                | -                       | -                                            | -                    | -                    | -                |
| 12932     | 5      | PAXgene (proprietary)  | PCE           | 1000                  | 1.11                               | 1110                    | 1.11                                         | 6.11                 | -3.11                | yes              |
| 12933     | 5      | PAXgene (proprietary)  | PAXgene       | 1000                  | 0.18                               | 180                     | 0.18                                         | 0.47                 | 0.09                 | no               |
| 12934     | 5      | PAXgene (proprietary)  | Nanobind      | 100                   | 8.32                               | 832                     | 8.32                                         | 1.93                 | 0.89                 | yes              |
| 12935     | 5      | PAXgene (proprietary)  | Magmax        | 90                    | 1.52                               | 136.8                   | 1.52                                         | 1.74                 | 0.2                  | yes              |
| 12938     | 6      | purple top tube (EDTA) | PCE           | 1000                  | 0.28                               | 280                     | 0.28                                         | -2.3                 | -0.43                | yes              |
| 12939     | 6      | purple top tube (EDTA) | PAXgene       | 1000                  | 4.44                               | 4440                    | 4.44                                         | 2.21                 | 9.32                 | no               |
| 12940     | 6      | purple top tube (EDTA) | Nanobind      | 100                   | 54                                 | 5400                    | 54                                           | 1.84                 | 1.16                 | yes              |
| 12941     | 6      | purple top tube (EDTA) | Magmax        | 90                    | 22.2                               | 1998                    | 22.2                                         | 1.56                 | 0.23                 | yes              |
| 12942     | 6      | PAXgene (proprietary)  | PCE           | 1000                  | 5.46                               | 5460                    | 5.46                                         | 2.3                  | 3.8                  | yes              |
| 12943     | 6      | PAXgene (proprietary)  | PAXgene       | 1000                  | 0.2                                | 200                     | 0.2                                          | -0.69                | -0.01                | no               |
| 12944     | 6      | PAXgene (proprietary)  | Nanobind      | 100                   | 18.7                               | 1870                    | 18.7                                         | 1.88                 | 1.85                 | yes              |
| 12945     | 6      | PAXgene (proprietary)  | Magmax        | 90                    | 11.48                              | 1033.2                  | 11.48                                        | 1.64                 | 0.27                 | yes              |
| 12948     | 7      | purple top tube (EDTA) | PCE           | 1000                  | 0.38                               | 380                     | 0.38                                         | 5.21                 | -1.68                | yes              |
| 12949     | 7      | purple top tube (EDTA) | PAXgene       | 1000                  | 10.8                               | 10800                   | 10.8                                         | 1.98                 | 6.79                 | no               |
| 12950     | 7      | purple top tube (EDTA) | Nanobind      | 100                   | 35.3                               | 3530                    | 35.3                                         | 1.84                 | 1.69                 | yes              |
| 12951     | 7      | purple top tube (EDTA) | Magmax        | 90                    | 2.63                               | 236.7                   | 2.63                                         | 1.62                 | 0.26                 | yes              |
| 12952     | 7      | PAXgene (proprietary)  | PCE           | 1000                  | 6.37                               | 6370                    | 6.37                                         | 2.2                  | 3.79                 | yes              |
| 12953     | 7      | PAXgene (proprietary)  | PAXgene       | 1000                  | 6.4                                | 6400                    | 6.4                                          | 2.38                 | -5.4                 | no               |
| 12954     | 7      | PAXgene (proprietary)  | Nanobind      | 100                   | 11.1                               | 1110                    | 11.1                                         | 1.87                 | 2.05                 | yes              |
| 12955     | 7      | PAXgene (proprietary)  | Magmax        | 90                    | 2.03                               | 182.7                   | 2.03                                         | 1.66                 | 0.35                 | yes              |
| 12958     | 8      | purple top tube (EDTA) | PCE           | 1000                  | 0.75                               | 750                     | 0.75                                         | 1.7                  | 3.37                 | yes              |
| 12959     | 8      | purple top tube (EDTA) | PAXgene       | 1000                  | 0.7                                | 700                     | 0.7                                          | 2.17                 | -0.19                | no               |
| 12960     | 8      | purple top tube (EDTA) | Nanobind      | 100                   | 8.13                               | 813                     | 8.13                                         | 1.84                 | 0.92                 | yes              |
| 12961     | 8      | purple top tube (EDTA) | Magmax        | 90                    | 2.33                               | 209.7                   | 2.33                                         | 1.53                 | 0.33                 | yes              |
| 12962     | 8      | PAXgene (proprietary)  | PCE           | 1000                  | 1.2                                | 1200                    | 1.2                                          | 2.04                 | 2.59                 | yes              |
| 12963     | 8      | PAXgene (proprietary)  | PAXgene       | 1000                  | 0.59                               | 590                     | 0.59                                         | -2.48                | -0.1                 | no               |
| 12964     | 8      | PAXgene (proprietary)  | Nanobind      | 100                   | 34.4                               | 3440                    | 34.4                                         | 1.95                 | 1.47                 | yes              |
| 12965     | 8      | PAXgene (proprietary)  | Magmax        | 90                    | 1.53                               | 137.7                   | 1.53                                         | 1.61                 | 0.3                  | yes              |

**Table S1.** Supplementary data from two storage and four nucleic acid (NA) extraction kits. Blood was preserved from four dogs (including Yella, Dog ID #7) using two different storage agents, then NA isolated using four different extraction kits. Subsets of this data were used in Tables 2 and 3. DNA 260/280 ratio, ~1.8 is considered 'pure' for DNA, ~2.0 is considered 'pure' for RNA. Expected 260/230 values are commonly in the range of 2.0–2.2.

429

|                          | Accession  | Total reads in SRA data set | Alignment rate |        |        | Total variants |         |         | Total variants with Q>=30 |         |         |
|--------------------------|------------|-----------------------------|----------------|--------|--------|----------------|---------|---------|---------------------------|---------|---------|
|                          |            |                             | CF             | GS     | YA     | CF             | GS      | YA      | CF                        | GS      | YA      |
| Individual SRA data sets | SRR7107545 | 79297278                    | 87.71%         | 88.72% | 89.01% | 1008955        | 1022372 | 856531  | 757681                    | 767110  | 610388  |
|                          | SRR7107565 | 374389398                   | 94.81%         | 95.40% | 95.57% | 1657855        | 1685942 | 1482554 | 1470154                   | 1491641 | 1285057 |
|                          | SRR7107566 | 121998250                   | 93.53%         | 94.10% | 94.58% | 834633         | 852825  | 733942  | 531972                    | 543237  | 436806  |
|                          | SRR7107603 | 92953674                    | 94.44%         | 95.02% | 95.27% | 951035         | 960583  | 872989  | 697209                    | 701258  | 614153  |
|                          | SRR7107659 | 68175288                    | 87.42%         | 87.82% | 88.43% | 746697         | 768908  | 663296  | 399711                    | 414764  | 333377  |
|                          | SRR7107891 | 194884164                   | 84.58%         | 84.87% | 85.22% | 966858         | 968391  | 881653  | 810122                    | 810288  | 723238  |
|                          | SRR7107920 | 108772996                   | 88.07%         | 88.58% | 88.97% | 1196487        | 1213229 | 1022336 | 743038                    | 754396  | 586261  |
|                          | SRR7107934 | 160276546                   | 93.08%         | 93.72% | 93.66% | 1187808        | 1210143 | 1088977 | 970907                    | 989545  | 867713  |
|                          | SRR7107937 | 195746152                   | 88.34%         | 88.86% | 88.90% | 1247033        | 1253446 | 1130930 | 1008700                   | 1012298 | 885721  |
|                          | SRR7107980 | 125140832                   | 88.61%         | 89.42% | 89.91% | 889701         | 913588  | 794798  | 771311                    | 791011  | 670657  |
| Statistics               | min        | 68175288                    | 84.58%         | 84.87% | 85.22% | 746697         | 768908  | 663296  | 399711                    | 414764  | 333377  |
|                          | max        | 374389398                   | 94.81%         | 95.40% | 95.57% | 1657855        | 1685942 | 1482554 | 1470154                   | 1491641 | 1285057 |
|                          | median     | 123569541                   | 88.47%         | 89.14% | 89.46% | 987907         | 995382  | 877321  | 764496                    | 779061  | 642405  |
|                          | mean       | 152163458                   | 90.06%         | 90.65% | 90.95% | 1068706        | 1084943 | 952801  | 816081                    | 827555  | 701337  |
|                          | stdev      | 89794139                    | 3.57%          | 3.61%  | 3.54%  | 264097         | 266210  | 238776  | 292096                    | 294242  | 266315  |
|                          | cov        | 0.59                        | 0.04           | 0.04   | 0.04   | 0.25           | 0.25    | 0.25    | 0.36                      | 0.36    | 0.38    |

**Table S2.** Alignment rates and total variants of ten Labrador Retriever Illumina sequence read data sets from SRA, with additional metrics and summary statistics. CF, Boxer (CanFam3.1), GCF\_000002285.3; GS, German Shepherd, GCA\_008641245.1; YA, Labrador Retriever (Yella\_v1.0), CP050567.1 - CP050606.1

430  
431
